# Supplementary material for: SARS-CoV-2 antibodies recognize 23 distinct epitopic sites on the receptor binding domain
Source: PubMed Central journal article supplement (PMC10509263; doi:10.1038/s42003-023-05332-w), 2023-09-19
Supplement: 42003_2023_5332_MOESM2_ESM.pdf [file 42003_2023_5332_MOESM2_ESM.pdf]

## **Supplementary Figures and Tables for:**

# **SARS-CoV-2 antibodies recognize 23 distinct epitopic sites on the receptor binding domain**

Jiansheng Jiang, Christopher T. Boughter, Javeed Ahmad,  
Kannan Natarajan, Lisa F. Boyd, Martin Meier-Schellersheim,  
David H. Margulies

This file contains in order:

Supplementary Table 1

Supplementary Fig. 1

Supplementary Table 2a, 2b and 2c

Supplementary Fig. 3a, 3b, 3c and 3d

Supplementary Table 3a and 3b

Supplementary Table 4a and 4b

Supplementary Fig. 4

Supplementary Fig. 5

Supplementary Fig. 6

Supplementary Fig. 7

References to Supplementary Figures and Tables

## Supplementary Table 1

| Barnes         | Definition                                    |
|----------------|-----------------------------------------------|
| <b>Class 1</b> | Block ACE2 and bind “up” RBD only             |
| <b>Class 2</b> | Block ACE2 and bind “up” and “down” RBD       |
| <b>Class 3</b> | Fail to block ACE2 but bind “up” & “down” RBD |
| <b>Class 4</b> | Fail to block ACE2 but bind “up” RBD only     |

**Supplementary Table 1. Characteristics of Barnes classification of Ab to the RBD of SARS-CoV-2.** As described by Barnes et al <sup>1</sup>, antibodies are classified by the location of their epitopes, in either the “up” and/or “down” orientations of the RBD in the spike trimer, and also on their ability to block binding to the cellular receptor, ACE2.

## Supplementary Fig. 1

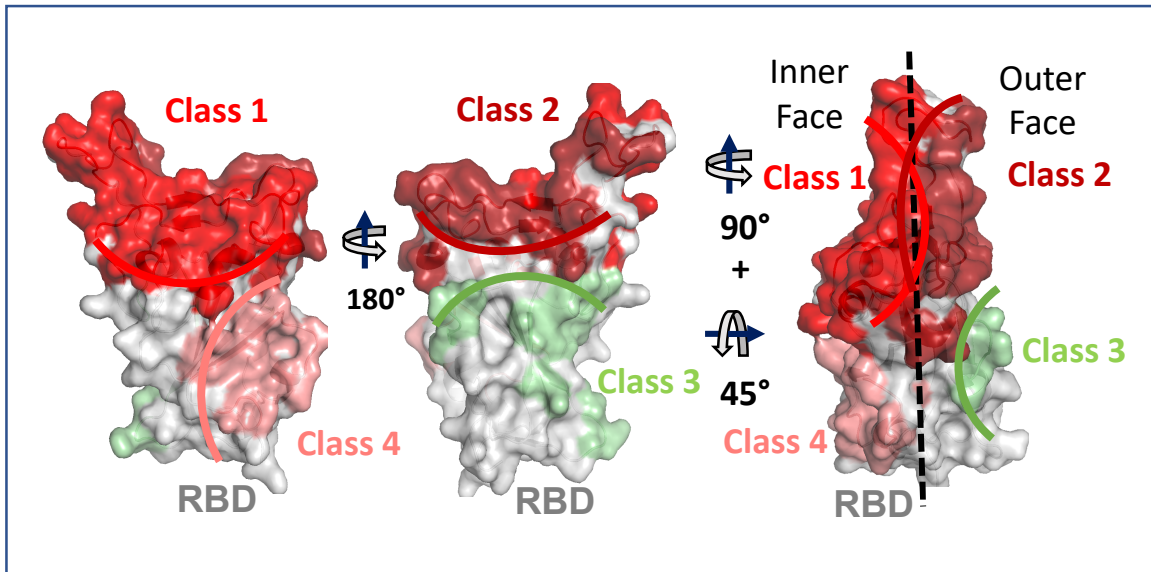

**Supplementary Fig. 1. Graphic depiction (footprint) of Barnes classification <sup>1</sup>.** Surface representation of the SARS-CoV-2 RBD (PDB 7BZ5\_A) is displayed with epitopic regions colored: Class 1, red; Class 2, firebrick; Class 3, lime; Class 4, salmon. There are many overlaps between Class 1 and Class 2.

# Supplementary Fig. 2

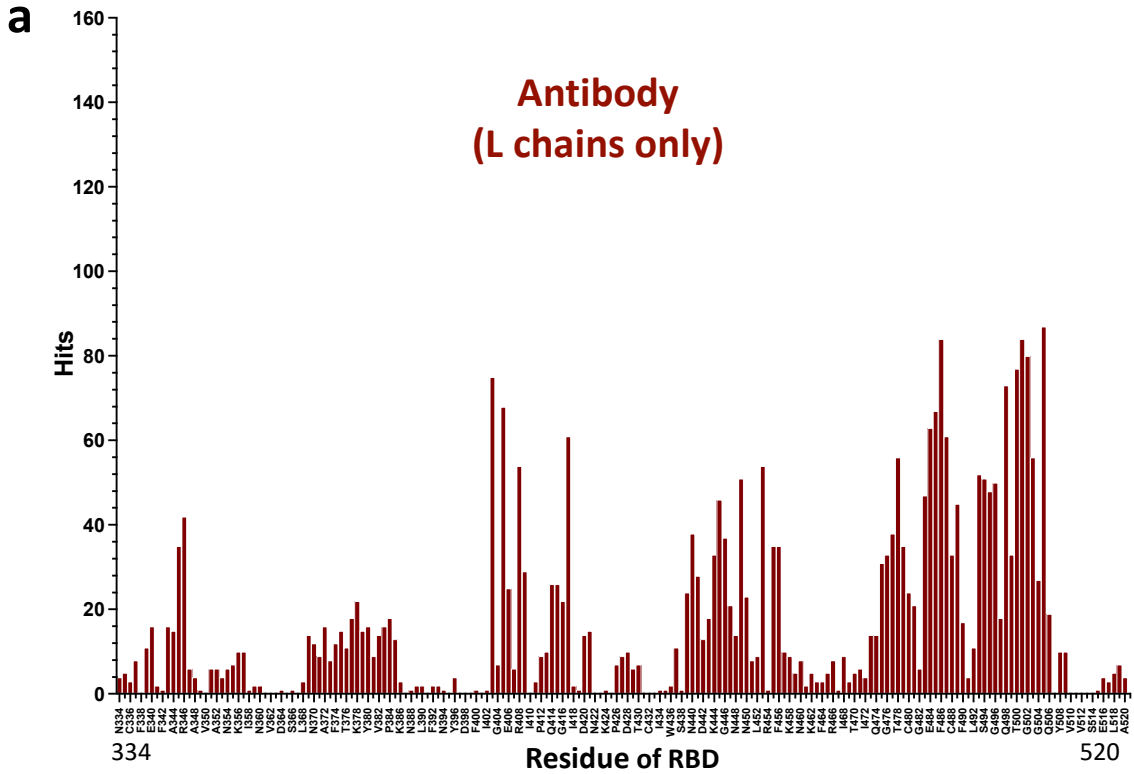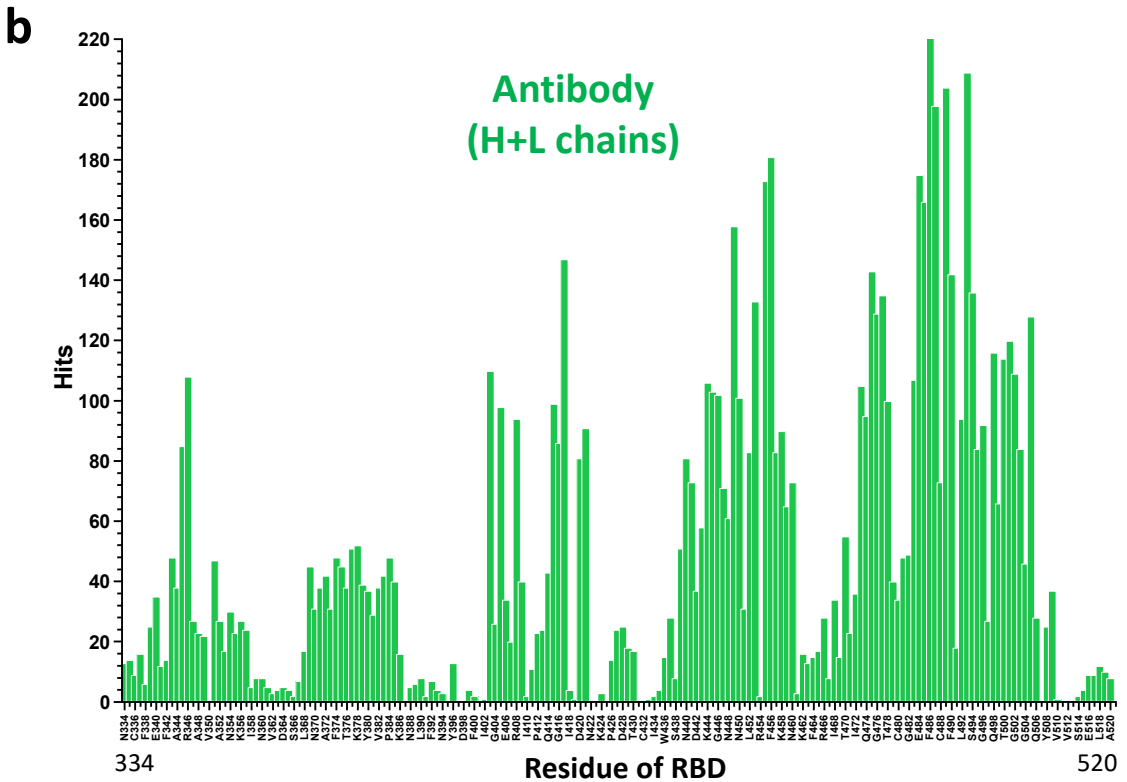

**Supplementary Fig. 2. Number of contacts to RBD by Ab L chains.** Total number of contacts to each of the indicated RBD residues summed from all available Ab X-ray and cryo-EM structures for Ab L chains. The odd number RBD residue names are omitted for clarity.

# Supplementary Table 2

**a**

| ES  | RANGE   | RBD       | Hits | (%)    | NONCDR | (%)   | CDR1 | (%)   | CDR2 | (%)   | CDR3 | (%)   |
|-----|---------|-----------|------|--------|--------|-------|------|-------|------|-------|------|-------|
| 0   | -----   | -----     | 226  | 4.02   | 15     | 0.27  | 25   | 0.44  | 49   | 0.87  | 137  | 2.44  |
| 1   | 339-341 | GEV       | 44   | 0.78   | 11     | 0.20  | 4    | 0.07  | 5    | 0.09  | 24   | 0.43  |
| 2   | 343-349 | NTRFAS    | 229  | 4.07   | 27     | 0.48  | 17   | 0.30  | 58   | 1.03  | 127  | 2.26  |
| 3   | 351-357 | YAWNRRKR  | 146  | 2.60   | 23     | 0.41  | 14   | 0.25  | 33   | 0.59  | 76   | 1.35  |
| 4   | 368-374 | LYNSASF   | 178  | 3.17   | 14     | 0.25  | 9    | 0.16  | 35   | 0.62  | 120  | 2.13  |
| 5   | 375-380 | STFKCY    | 163  | 2.90   | 22     | 0.39  | 10   | 0.18  | 16   | 0.28  | 115  | 2.05  |
| 6   | 381-386 | GVSPTK    | 140  | 2.49   | 20     | 0.36  | 22   | 0.39  | 16   | 0.28  | 82   | 1.46  |
| 7   | 403-409 | RGDEVQR   | 155  | 2.76   | 24     | 0.43  | 18   | 0.32  | 20   | 0.36  | 93   | 1.65  |
| 8   | 411-417 | APGQTGK   | 276  | 4.91   | 121    | 2.15  | 29   | 0.52  | 56   | 1.00  | 70   | 1.24  |
| 9   | 420-428 | DYNYKLPDD | 182  | 3.24   | 15     | 0.27  | 21   | 0.37  | 116  | 2.06  | 30   | 0.53  |
| 10  | 437-443 | NSNNLDS   | 202  | 3.59   | 19     | 0.34  | 14   | 0.25  | 32   | 0.57  | 137  | 2.44  |
| 11  | 444-449 | KVGGNY    | 399  | 7.10   | 125    | 2.22  | 68   | 1.21  | 88   | 1.57  | 118  | 2.10  |
| 12  | 450-454 | NYLYR     | 257  | 4.57   | 33     | 0.59  | 32   | 0.57  | 60   | 1.07  | 132  | 2.35  |
| 13  | 455-460 | LFKRSN    | 561  | 9.98   | 101    | 1.80  | 66   | 1.17  | 226  | 4.02  | 168  | 2.99  |
| 14  | 462-467 | KPFERD    | 72   | 1.28   | 17     | 0.30  | 9    | 0.16  | 10   | 0.18  | 36   | 0.64  |
| 15  | 468-472 | ISTEI     | 137  | 2.44   | 34     | 0.60  | 25   | 0.44  | 30   | 0.53  | 48   | 0.85  |
| 16  | 473-479 | YQAGSTP   | 525  | 9.34   | 41     | 0.73  | 299  | 5.32  | 7    | 0.12  | 178  | 3.17  |
| 17  | 481-484 | NGVE      | 245  | 4.36   | 103    | 1.83  | 15   | 0.27  | 59   | 1.05  | 68   | 1.21  |
| 18  | 485-487 | GFN       | 397  | 7.06   | 90     | 1.60  | 44   | 0.78  | 54   | 0.96  | 209  | 3.72  |
| 19  | 488-491 | CYFP      | 336  | 5.98   | 40     | 0.71  | 28   | 0.50  | 71   | 1.26  | 197  | 3.50  |
| 20  | 492-496 | LQSYG     | 402  | 7.15   | 25     | 0.44  | 88   | 1.57  | 93   | 1.65  | 196  | 3.49  |
| 21  | 497-502 | FQPTNG    | 190  | 3.38   | 48     | 0.85  | 46   | 0.82  | 25   | 0.44  | 71   | 1.26  |
| 22  | 503-509 | VGYPYR    | 136  | 2.42   | 23     | 0.41  | 17   | 0.30  | 17   | 0.30  | 79   | 1.40  |
| 23  | 516-520 | ELLHA     | 25   | 0.44   | 5      | 0.09  | 4    | 0.07  | 0    | 0.00  | 16   | 0.28  |
| SUM | -----   | -----     | 5623 | 100.00 | 996    | 17.71 | 924  | 16.43 | 1176 | 20.91 | 2527 | 44.94 |

**b**

| ES  | RANGE   | RBD       | Hits | (%)   | NONCDR | (%)   | CDR1 | (%)   | CDR2 | (%)  | CDR3 | (%)   |
|-----|---------|-----------|------|-------|--------|-------|------|-------|------|------|------|-------|
| 0   | -----   | -----     | 102  | 3.28  | 21     | 0.68  | 52   | 1.67  | 12   | 0.39 | 17   | 0.55  |
| 1   | 339-341 | GEV       | 29   | 0.93  | 9      | 0.29  | 9    | 0.29  | 2    | 0.06 | 9    | 0.29  |
| 2   | 343-349 | NTRFAS    | 114  | 3.67  | 40     | 1.29  | 39   | 1.26  | 8    | 0.26 | 27   | 0.87  |
| 3   | 351-357 | YAWNRRKR  | 49   | 1.58  | 14     | 0.45  | 25   | 0.80  | 6    | 0.19 | 4    | 0.13  |
| 4   | 368-374 | LYNSASF   | 74   | 2.38  | 17     | 0.55  | 34   | 1.09  | 10   | 0.32 | 13   | 0.42  |
| 5   | 375-380 | STFKCY    | 97   | 3.12  | 21     | 0.68  | 30   | 0.97  | 17   | 0.55 | 29   | 0.93  |
| 6   | 381-386 | GVSPTK    | 73   | 2.35  | 22     | 0.71  | 20   | 0.64  | 12   | 0.39 | 19   | 0.61  |
| 7   | 403-409 | RGDEVQR   | 264  | 8.50  | 61     | 1.96  | 41   | 1.32  | 28   | 0.90 | 134  | 4.31  |
| 8   | 411-417 | APGQTGK   | 157  | 5.05  | 53     | 1.71  | 30   | 0.97  | 37   | 1.19 | 37   | 1.19  |
| 9   | 420-428 | DYNYKLPDD | 56   | 1.80  | 21     | 0.68  | 15   | 0.48  | 14   | 0.45 | 6    | 0.19  |
| 10  | 437-443 | NSNNLDS   | 133  | 4.28  | 30     | 0.97  | 67   | 2.16  | 9    | 0.29 | 27   | 0.87  |
| 11  | 444-449 | KVGGNY    | 202  | 6.50  | 77     | 2.48  | 39   | 1.26  | 28   | 0.90 | 58   | 1.87  |
| 12  | 450-454 | NYLYR     | 95   | 3.06  | 14     | 0.45  | 54   | 1.74  | 7    | 0.23 | 20   | 0.64  |
| 13  | 455-460 | LFKRSN    | 102  | 3.28  | 19     | 0.61  | 42   | 1.35  | 29   | 0.93 | 12   | 0.39  |
| 14  | 462-467 | KPFERD    | 25   | 0.80  | 5      | 0.16  | 12   | 0.39  | 5    | 0.16 | 3    | 0.10  |
| 15  | 468-472 | ISTEI     | 27   | 0.87  | 9      | 0.29  | 7    | 0.23  | 5    | 0.16 | 6    | 0.19  |
| 16  | 473-479 | YQAGSTP   | 221  | 7.11  | 51     | 1.64  | 125  | 4.02  | 4    | 0.13 | 41   | 1.32  |
| 17  | 481-484 | NGVE      | 138  | 4.44  | 40     | 1.29  | 36   | 1.16  | 13   | 0.42 | 49   | 1.58  |
| 18  | 485-487 | GFN       | 241  | 7.76  | 76     | 2.45  | 59   | 1.90  | 14   | 0.45 | 92   | 2.96  |
| 19  | 488-491 | CYFP      | 99   | 3.19  | 30     | 0.97  | 33   | 1.06  | 8    | 0.26 | 28   | 0.90  |
| 20  | 492-496 | LQSYG     | 212  | 6.82  | 18     | 0.58  | 166  | 5.34  | 10   | 0.32 | 18   | 0.58  |
| 21  | 497-502 | FQPTNG    | 365  | 11.75 | 73     | 2.35  | 232  | 7.47  | 8    | 0.26 | 52   | 1.67  |
| 22  | 503-509 | VGYPYR    | 209  | 6.73  | 45     | 1.45  | 83   | 2.67  | 13   | 0.42 | 68   | 2.19  |
| 23  | 516-520 | ELLHA     | 23   | 0.74  | 6      | 0.19  | 13   | 0.42  | 3    | 0.10 | 1    | 0.03  |
| SUM | -----   | -----     | 3107 | 100   | 772    | 24.85 | 1263 | 40.65 | 302  | 9.72 | 770  | 24.78 |

**c**

| ES  | RANGE   | RBD       | Hits | (%)  | NONCDR | (%)   | CDR1 | (%)   | CDR2 | (%)   | CDR3 | (%)   |
|-----|---------|-----------|------|------|--------|-------|------|-------|------|-------|------|-------|
| 0   | -----   | -----     | 101  | 5.50 | 28     | 1.53  | 12   | 0.65  | 10   | 0.54  | 51   | 2.78  |
| 1   | 339-341 | GEV       | 3    | 0.16 | 0      | 0.00  | 0    | 0.00  | 0    | 0.00  | 3    | 0.16  |
| 2   | 343-349 | NTRFAS    | 52   | 2.83 | 12     | 0.65  | 7    | 0.38  | 0    | 0.00  | 33   | 1.80  |
| 3   | 351-357 | YAWNRRKR  | 69   | 3.76 | 19     | 1.03  | 6    | 0.33  | 9    | 0.49  | 35   | 1.91  |
| 4   | 368-374 | LYNSASF   | 129  | 7.03 | 18     | 0.98  | 0    | 0.00  | 24   | 1.31  | 87   | 4.74  |
| 5   | 375-380 | STFKCY    | 128  | 6.97 | 29     | 1.58  | 5    | 0.27  | 4    | 0.22  | 90   | 4.90  |
| 6   | 381-386 | GVSPTK    | 101  | 5.50 | 12     | 0.65  | 26   | 1.42  | 12   | 0.65  | 51   | 2.78  |
| 7   | 403-409 | RGDEVQR   | 86   | 4.68 | 10     | 0.54  | 7    | 0.38  | 3    | 0.16  | 66   | 3.59  |
| 8   | 411-417 | APGQTGK   | 51   | 2.78 | 19     | 1.03  | 7    | 0.38  | 3    | 0.16  | 22   | 1.20  |
| 9   | 420-428 | DYNYKLPDD | 31   | 1.69 | 10     | 0.54  | 6    | 0.33  | 1    | 0.05  | 14   | 0.76  |
| 10  | 437-443 | NSNNLDS   | 27   | 1.47 | 19     | 1.03  | 0    | 0.00  | 1    | 0.05  | 7    | 0.38  |
| 11  | 444-449 | KVGGNY    | 154  | 8.39 | 68     | 3.70  | 32   | 1.74  | 31   | 1.69  | 23   | 1.25  |
| 12  | 450-454 | NYLYR     | 105  | 5.72 | 24     | 1.31  | 22   | 1.20  | 22   | 1.20  | 37   | 2.02  |
| 13  | 455-460 | LFKRSN    | 78   | 4.25 | 13     | 0.71  | 7    | 0.38  | 3    | 0.16  | 55   | 3.00  |
| 14  | 462-467 | KPFERD    | 24   | 1.31 | 6      | 0.33  | 3    | 0.16  | 0    | 0.00  | 15   | 0.82  |
| 15  | 468-472 | ISTEI     | 82   | 4.47 | 29     | 1.58  | 9    | 0.49  | 29   | 1.58  | 15   | 0.82  |
| 16  | 473-479 | YQAGSTP   | 13   | 0.71 | 2      | 0.11  | 2    | 0.11  | 0    | 0.00  | 9    | 0.49  |
| 17  | 481-484 | NGVE      | 97   | 5.28 | 30     | 1.63  | 9    | 0.49  | 44   | 2.40  | 14   | 0.76  |
| 18  | 485-487 | GFN       | 67   | 3.65 | 24     | 1.31  | 3    | 0.16  | 15   | 0.82  | 25   | 1.36  |
| 19  | 488-491 | CYFP      | 108  | 5.88 | 22     | 1.20  | 12   | 0.65  | 11   | 0.60  | 63   | 3.43  |
| 20  | 492-496 | LQSYG     | 178  | 9.69 | 45     | 2.45  | 39   | 2.12  | 21   | 1.14  | 73   | 3.98  |
| 21  | 497-502 | FQPTNG    | 54   | 2.94 | 25     | 1.36  | 12   | 0.65  | 10   | 0.54  | 7    | 0.38  |
| 22  | 503-509 | VGYPYR    | 76   | 4.14 | 22     | 1.20  | 4    | 0.22  | 4    | 0.22  | 46   | 2.51  |
| 23  | 516-520 | ELLHA     | 22   | 1.20 | 7      | 0.38  | 2    | 0.11  | 2    | 0.11  | 11   | 0.60  |
| SUM | -----   | -----     | 1836 | 100  | 493    | 26.85 | 232  | 12.64 | 259  | 14.11 | 852  | 46.41 |

**Supplementary Table 2. Statistics for CDR loop distribution (contact numbers and percentage) on 23 ES. a Antibody Heavy chains. b Antibody Light chains. c Nanobodies.**



# Supplementary Fig. 3

**a**

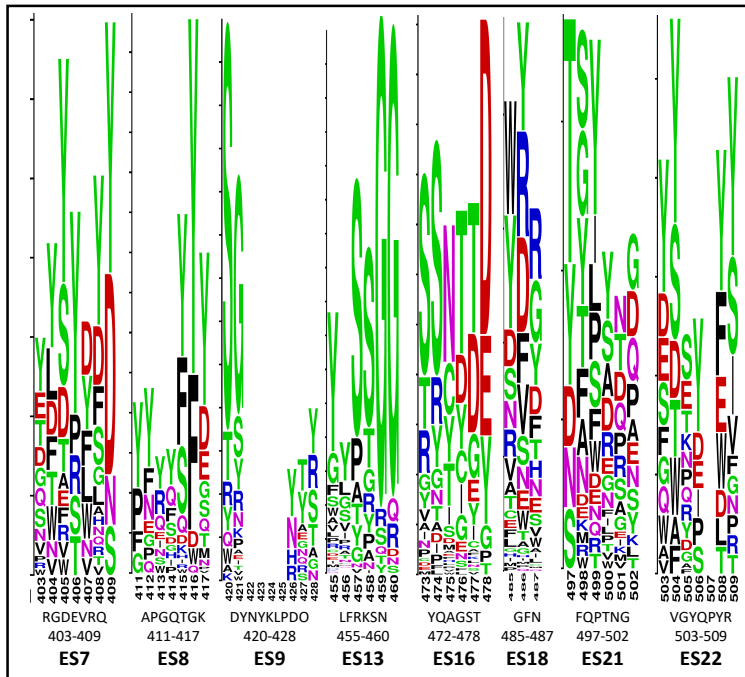

**b**

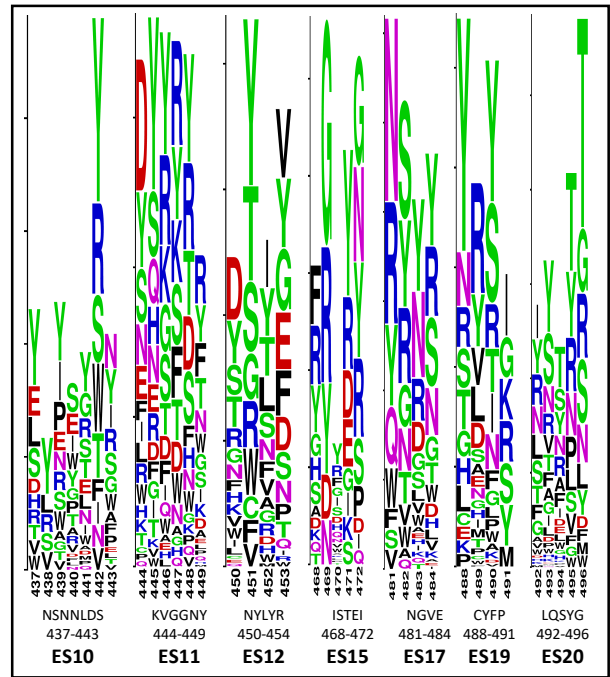

**c**

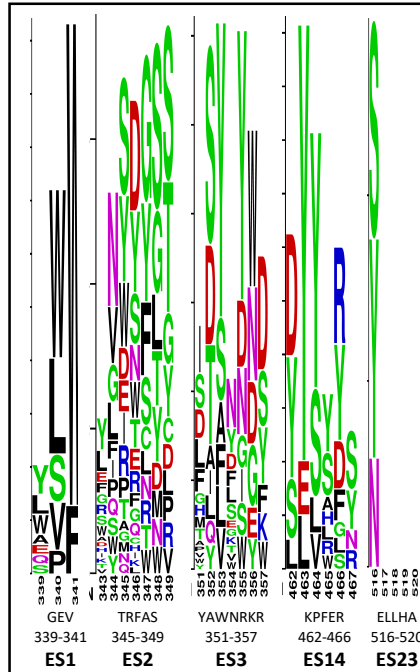

**d**

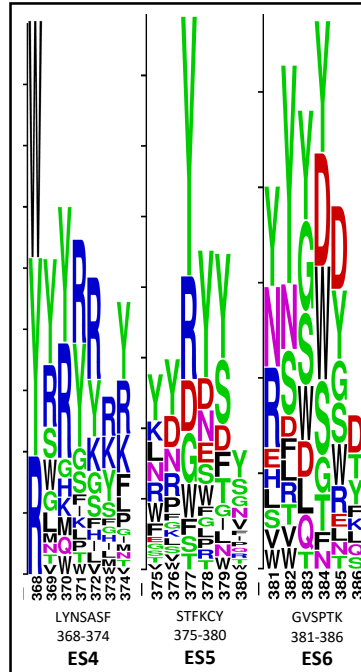

**Supplementary Fig. 3 Paratope (antibody H chain) amino acids against 23 epitopic sites (ES) on RBD.** WebLogo plots of antibody (H chain) sequences in contact with each residues of RBD. The plots are grouped against each ES. The size of letter (logo) reflects relative frequency of the amino acids within the group <sup>2</sup> ). **a** Class-1, ES=(7,8,9,13,16,18,21,22), **b** Class-2, ES=(10,11,12,15,17,19,20), **c** Class-3, ES=(1,2,3,14,23), **d** Class-4, ES=(4,5,6).

# Supplementary Table 3a

| CLUSTER | MEMBERS | ES                                   | LIST (Similarity>=0.85)                                                                                                                                                                                                                                                                                                                                                                                                                                          |
|---------|---------|--------------------------------------|------------------------------------------------------------------------------------------------------------------------------------------------------------------------------------------------------------------------------------------------------------------------------------------------------------------------------------------------------------------------------------------------------------------------------------------------------------------|
| A1      | 56      | (8,9,12,13,16,17,18,19,20)           | PDI-231,CV2-2325,A8-1,COVA2-04,Windsor-C98C7,P5A-3C8,CB6,C1A-B12,C102,BG4-25,BD-629,BD-604,P5A-2F11,AZ090,PDI-42,BD-508,BD-503,TAU-2303,scFv-E4,R40-1G8,PDI-37,PDI-222,P4A1,P2C-1F11,P22A-1D1,Omi-3,Omi-18,Minenkova-76,ION-360,CV30,COVOX-40,COVOX-269,COVOX-253,COVOX-222,COVOX-150,CovV11,CC12-3,C099,C098,Beta-27,BD-744,BD-236,ab1,WRAIR-2125,UT28K,CV503,Windsor-G32A4,COV2-2196,STE90-C11,P5A-1B8,LY-CoV481,FI-3A,B38,A19-61-1,910-30,10D12-ab1,COVOX-158 |
| A2      | 45      | (8,9,13,15,16,18,19,20)              | nCoV-61,TAU-2303,scFv-E4,R40-1G8,PDI-37,PDI-222,P4A1,P2C-1F11,P22A-1D1,Omi-3,Omi-18,Minenkova-76,ION-360,CV30,COVOX-40,COVOX-269,COVOX-253,COVOX-222,COVOX-150,CovV11,CC12-3,C099,C098,Beta-27,BD-744,BD-236,ab1,P2B-1A10,STE90-C11,P5A-1B8,LY-CoV481,FI-3A,B38,A19-61-1,910-30,10D12-ab1,ZCB11,XGv265,Omi-12,Ab-58G6,CV2-1169,B1-182-1,A23-58-1,P5A-3A1,LY-CoV488,BD-515                                                                                        |
| A3      | 39      | (7,8,9,12,13,16,18,19,20,22)         | P5A-1D2,C1A-F10,C1A-C2,Beta-47,PDI-96,Windsor-C98C7,P5A-3C8,CB6,C1A-B12,C102,BG4-25,BD-629,BD-604,TAU-2303,scFv-E4,R40-1G8,PDI-37,PDI-222,P4A1,P2C-1F11,P22A-1D1,Omi-3,Omi-18,Minenkova-76,ION-360,CV30,COVOX-40,COVOX-269,COVOX-253,COVOX-222,COVOX-150,CovV11,CC12-3,C099,C098,Beta-27,BD-744,BD-236,ab1,C105                                                                                                                                                  |
| A4      | 21      | (11,12,13,17,18,19,20,21)            | S2-M11,P5A-1B9,P2C-1A3,Fab2-4,Fab2-15,C121,2B04,TAU-2212,CA521,nCov-617,COVOX-384,C002,Fab2-43,COVOX-316,Ab496,Ab354,2H2,Omi-25,Fab-15033-7,Fab-15033,WRAIR-2173,P2B4                                                                                                                                                                                                                                                                                            |
| A5      | 19      | (2,10,11,12,21,22)                   | S2X324,M8a-28,LY-CoV1404,C032,BD55-5840,BD55-3546,BD-812,32C7-Fab30,XG005,X10,J5026,FD-11A,A5-10,2H04,PR961,hu33,Fab2-7,COV2-2130,BD-804,AZD-1061                                                                                                                                                                                                                                                                                                                |
| A6      | 18      | (2,3,11,12,13,14,15,17,19,20)        | R1-32,PDI-215,Li-D2,COVOX-58,BD-813,6M6,35B5,BD-667,Ab326,Zhou-47D1,PDI-93,P2B-2F6,P1D9,Omi-31,NA8,N-612-017,Fab1-57,Fab-52,COVOX-278                                                                                                                                                                                                                                                                                                                            |
| A7      | 16      | (2,3,11,12,15,17,19,20,21)           | Omi-6,BD-667,CV07-270,Zhou-47D1,PDI-93,P2B-2F6,P1D9,Omi-31,NA8,N-612-017,Fab1-57,Fab-52,COVOX-278,C548,PD36-5D2,Omi-32,JMB2002                                                                                                                                                                                                                                                                                                                                   |
| A8      | 15      | (8,13,16,18,19,20,22)                | BD-836,UT28K,CV503,Windsor-G32A4,COV2-2196,STE90-C11,P5A-1B8,LY-CoV481,FI-3A,B38,A19-61-1,910-30,10D12-ab1,CV2-1169,B1-182-1,A23-58-1                                                                                                                                                                                                                                                                                                                            |
| A9      | 15      | (2,11,12,15,17,18,19,20)             | BD-368-2,Zhou-47D1,PDI-93,P2B-2F6,P1D9,Omi-31,NA8,N-612-017,Fab1-57,Fab-52,COVOX-278,DH1041,WRAIR-2173,P2B4,NE12,CV05-163                                                                                                                                                                                                                                                                                                                                        |
| A10     | 11      | (7,9,11,12,13,16,17,18,19,20,21,22)  | PDI-210,S-B8,Beta-29,PR1077,REGN10933,C1A-B3,Beta-22,S2K146,MW07,XGv051,Ab445,P5A-1B6                                                                                                                                                                                                                                                                                                                                                                            |
| A11     | 10      | (4,5,6,23)                           | S304-O1,S304,Liu-10-28,EY6A,S2A4,M8a-6,M8a-3,GH-12,CR3022,C1C-A3,Asarnow-3D11                                                                                                                                                                                                                                                                                                                                                                                    |
| A12     | 10      | (13,16,18,19)                        | T6,S5D2,S-E6,RBD-chAb-45,PR953,M31A7,CV07-250,8D3,7F15,7F12,7FOX                                                                                                                                                                                                                                                                                                                                                                                                 |
| A13     | 10      | (13,16,17,18,19,20)                  | P5C3,P5A-3C12,Hu-Clone6,COVOX-45,WCSL-129,HbcN3-C6,AZD-8895,13G9,THSC20-HVTR26,BD-623,ab4                                                                                                                                                                                                                                                                                                                                                                        |
| A14     | 9       | (1,2,3,10,11,12,14,15,17,19,20,22)   | G32R7,ab5,PDI-215,Li-D2,COVOX-58,BD-813,6M6,35B5,BD-667,CV07-270                                                                                                                                                                                                                                                                                                                                                                                                 |
| A15     | 8       | (3,11,12,15,16,17,18,19,20)          | BG1-24,S2D106,MW05,DH1043,DH1042,Bamlanivimab,553-60,Beta-38,DH1041                                                                                                                                                                                                                                                                                                                                                                                              |
| A16     | 8       | (8,11,12,13,15,16,17,18,19,20,21,22) | BG7-20,S-B8,PR1077,C144,BD23,S2K146,MW07,Ab188,C051                                                                                                                                                                                                                                                                                                                                                                                                              |
| A17     | 7       | (4,5,6,7)                            | S2X259,S2A4,M8a-6,M8a-3,GH-12,CR3022,C1C-A3,Asarnow-3D11                                                                                                                                                                                                                                                                                                                                                                                                         |
| A18     | 7       | (4,5,6,7,8,9,13)                     | COVA1-16,Liu-10-40,Fab2-36,Windsor-G32Q4,VacW-209,M8a-34,Goike-N3-1,ADI-62113                                                                                                                                                                                                                                                                                                                                                                                    |
| A19     | 7       | (11,13,15,17,18,19,20)               | Asarnow-5A6,DH1041,Fab2-43,COVOX-316,Ab496,Ab354,2H2,Omi-9                                                                                                                                                                                                                                                                                                                                                                                                       |
| A20     | 7       | (8,9,11,13,16,17,18,19,20,21)        | BD-771,Ab188,COVA2-39,J08,PDI-42,BD-508,BD-503,P2B-1A10                                                                                                                                                                                                                                                                                                                                                                                                          |
| A21     | 6       | (3,12,13,15,17,18,19,20)             | P17,553-60,Ab326,Omi-9,Omi-25,Fab-15033-7,Fab-15033                                                                                                                                                                                                                                                                                                                                                                                                              |
| A22     | 5       | (16,17,18,19)                        | CV2-6264,Beta-54,Ab159,WCSL-119,CR3022-B6,S2H13                                                                                                                                                                                                                                                                                                                                                                                                                  |
| A23     | 5       | (4,5,6,7,8,22)                       | STS165,BD55-1239,S2X35,RBD-chAb-15,Ab-3467,553-15                                                                                                                                                                                                                                                                                                                                                                                                                |
| A24     | 5       | (4,5,6,7,21,22)                      | DH1047,GW01,BD55-5514,S2X35,RBD-chAb-15,Ab-3467                                                                                                                                                                                                                                                                                                                                                                                                                  |
| A25     | 4       | (7,8,21,22)                          | ADI-55688,3C1,REGN10985,RBD-chAb-25,ADG-20                                                                                                                                                                                                                                                                                                                                                                                                                       |
| A26     | 4       | (4,5,6,7,10,22)                      | MW06,CV2-75,S2X35,RBD-chAb-15,Ab-3467                                                                                                                                                                                                                                                                                                                                                                                                                            |
| A27     | 4       | (4,5,7,10,21,22)                     | K398-22,K288-2,BD55-4637,GW01,BD55-5514                                                                                                                                                                                                                                                                                                                                                                                                                          |
| A28     | 4       | (1,2,4,10,11,12,22)                  | BG10-19,SW186,CV38-142,SP1-77,XG014                                                                                                                                                                                                                                                                                                                                                                                                                              |
| A29     | 3       | (4,7,21,22)                          | Beta-32,REGN10985,RBD-chAb-25,ADG-20                                                                                                                                                                                                                                                                                                                                                                                                                             |
| A30     | 3       | (2,4,10,11,21)                       | ZWC6,C135,BD-821,ZWD12                                                                                                                                                                                                                                                                                                                                                                                                                                           |
| A31     | 3       | (7,11,20,21,22)                      | C119,Beta-6,Beta-40,Beta-24                                                                                                                                                                                                                                                                                                                                                                                                                                      |
| A32     | 3       | (10,11,20,21,22)                     | Beta-44,Beta-6,Beta-40,Beta-24                                                                                                                                                                                                                                                                                                                                                                                                                                   |
| A33     | 3       | (3,9,13,14,15,23)                    | ION-300,WRAIR-2057,S2H97,HSW-1                                                                                                                                                                                                                                                                                                                                                                                                                                   |

## Supplementary Table 3b

| CLUSTER | MEMBERS | ES                                      | LIST (Similarity>=0.85)                                                                       |
|---------|---------|-----------------------------------------|-----------------------------------------------------------------------------------------------|
| N1      | 13      | (4,5,6,7,8,10,21,22)                    | Xu-Nb12,VHH-72,Nb95,VHH-V,1-2C7,Xu-Nb30,WNb-10,VHH-W,VHH-E,Re9D06,NM1226,Nb34,Hong-7A3,Huo-C1 |
| N2      | 9       | (7,8,9,11,12,13,16,17,18,19,20,21,22)   | B01,DL4,WNb-2,Re5D06,NIH-CoVnb-112,MR17,Sb14,Sb16,Nb6,Huo-C5                                  |
| N3      | 7       | (3,8,11,12,13,15,17,18,19,20)           | Nb20,Sota-1C,NB1B11,F6,Nb21,Huo-H3,aRBD-7,aRBD-5                                              |
| N4      | 6       | (2,11,12,13,15,17,19,20)                | H11-H4m,H11-H4,H11-D4,H11-H6,H11-B5,H11-A10,H11                                               |
| N5      | 6       | (2,3,11,12,14,15,17,18,19,20)           | Maeda-P86,Sota-1C,Ty1,K-874A,VHH-G09,Nb17,DL28                                                |
| N6      | 6       | (2,3,7,8,11,12,13,14,15,17,18,19,20,22) | Hong-8A2,WNb-2,Re5D06,NIH-CoVnb-112,MR17,Sb45,NM1230                                          |
| N7      | 5       | (4,5,6,7,8,9,22)                        | VHH-F04,NB1A7,Huo-C1,Nb-2-38,Nb-1-8,Nb-1-25                                                   |
| N8      | 4       | (11,12,13,17,18,19,20)                  | Wu-Nb22,H11-H6,H11-B5,H11-A10,H11                                                             |
| N9      | 4       | (11,12,13,15,16,17,18,19,20,21,22)      | Casasnovas-2-15,Huo-C5,VHH-U,VHH-12,VH-ab6                                                    |
| N10     | 4       | (1,2,3,10,11,12,14,15,17,19,20,21)      | Bn03-n3113v,VHH-G09,Nb17,DL28,N3113                                                           |

**Supplementary Tables 3a and 3b. List of clusters based on the similarity of ES. a** 33 Antibody clusters from A1 to A33. **b** 10 Antibody clusters from N1 to N10. Each cluster is grouped as a specific ES combination with a similarity of 0.85 or higher for the members. The similarity of ES between different clusters is less than 0.85.

# Supplementary Table 4

**a**

| Name            | PDB         | Sim  | ES=(2,3,10,11,12,15,17,19)         | Multi-contacts            |
|-----------------|-------------|------|------------------------------------|---------------------------|
| <b>Antibody</b> |             |      |                                    |                           |
| <b>G32R7</b>    | <b>7n64</b> | 0.80 | (1,2,3,10,11,12,14,15,17,19,20,22) | (2,7,4,1,3,2,1,3,4,1,1,1) |
| Li-D2           | 7xmz        | 0.78 | (1,2,3,11,12,14,15,17,19,20)       | (2,7,3,2,2,1,2,1,1,1)     |
| 6M6             | 7wk0        | 0.78 | (1,2,3,11,12,14,15,17,19,20)       | (3,7,4,3,3,1,4,3,1,1)     |
| PDI-215         | 7mzm        | 0.78 | (1,2,3,11,12,14,15,17,19,20)       | (2,6,7,4,2,1,3,1,1,1)     |
| COVOX-58        | 7qny        | 0.78 | (1,2,3,11,12,14,15,17,19,20)       | (2,6,5,2,2,1,3,3,1,1)     |
| 35B5            | 7e9p        | 0.78 | (1,2,3,11,12,14,15,17,19,20)       | (2,6,4,2,2,1,2,4,1,1)     |
| ab5             | 7e3b        | 0.89 | (2,3,10,11,12,14,15,17,19,22)      | (5,3,3,3,3,1,3,3,1,1)     |
| BD-813          | 7ey0        | 0.78 | (1,2,3,11,12,14,15,17,19,20)       | (2,5,5,1,2,1,2,4,1,1)     |
| <b>Omi-32</b>   | <b>7zfe</b> | 0.80 | (2,3,11,12,15,19,20)               | (5,2,4,2,1,1,1)           |
| <b>Nanobody</b> |             |      |                                    |                           |
| <b>N3113</b>    | <b>7vnb</b> | 0.82 | (1,2,3,11,12,15,17,19,20)          | (1,6,4,2,2,4,2,1,3)       |
| Bn03-n3113v     | 7whi        | 0.80 | (1,2,3,10,11,12,14,15,17,19,20,21) | (1,5,4,2,5,2,1,3,1,1,2,1) |
| DL28            | 7f5h        | 0.82 | (2,3,11,12,14,15,17,19,20)         | (5,6,2,3,1,5,4,1,1)       |
| N3113-1         | 7vne        | 0.80 | (2,3,11,12,15,19,20)               | (5,2,1,2,2,1,3)           |

**b**

| Name            | PDB         | Sim  | ES=(17,18,19)                | Multi-contacts         |
|-----------------|-------------|------|------------------------------|------------------------|
| <b>Antibody</b> |             |      |                              |                        |
| P5A-3C12        | 7d0b        | 0.75 | (13,17, <b>18</b> ,19,20)    | (1,2, <b>3</b> ,2,1)   |
| <b>COVOX-45</b> | <b>7bel</b> | 0.75 | (13,17, <b>18</b> ,19,20)    | (2,1, <b>3</b> ,3,1)   |
| THSC20-HVTR26   | 7z0x        | 0.75 | (13,16,17, <b>18</b> ,19)    | (1,4,2, <b>3</b> ,3)   |
| BD-623          | 7e7y        | 0.75 | (13,16,17, <b>18</b> ,19)    | (1,5,2, <b>3</b> ,3)   |
| ab4             | 7e39        | 0.75 | (13,16,17, <b>18</b> ,19)    | (1,3,1, <b>3</b> ,1)   |
| Beta-26         | 7q9j        | 0.75 | (12,15,17, <b>18</b> ,19)    | (2,1,4, <b>3</b> ,1)   |
| CV2-6264        | 7qf1        | 0.86 | (16,17, <b>18</b> ,19)       | (3,2, <b>3</b> ,1)     |
| Beta-54         | 7ps6        | 0.86 | (16,17, <b>18</b> ,19)       | (5,2, <b>3</b> ,2)     |
| CR3022-B6       | 7kzb        | 1.00 | (17, <b>18</b> ,19)          | (1, <b>3</b> ,2)       |
| <b>Nanobody</b> |             |      |                              |                        |
| <b>Nb-2-67</b>  | <b>8cya</b> | 0.67 | (13,16,17, <b>18</b> ,19,20) | (2,4,2, <b>3</b> ,3,1) |

**Supplementary Table 4a and 4b. a** A cluster of antibodies and nanobodies that have multiple contacts with ES2 (R346). The list of Abs and Nbs with a similarity (Sim) to ES=(2,3,10,11,12,15,17,19) are sorted by the multiplicity at ES2. The numbers in bracket of “Multi-contacts” are the multiplicity of contacts corresponding to each ES site number. **b** A cluster of antibodies and nanobodies with a similarity (Sim) to ES=(17,18,19) that have multiple contacts with ES18 (F486). A major distinct newly effective mutation of XBB.1.5 is F486P (ES18).

# Supplementary Fig. 4

**a**

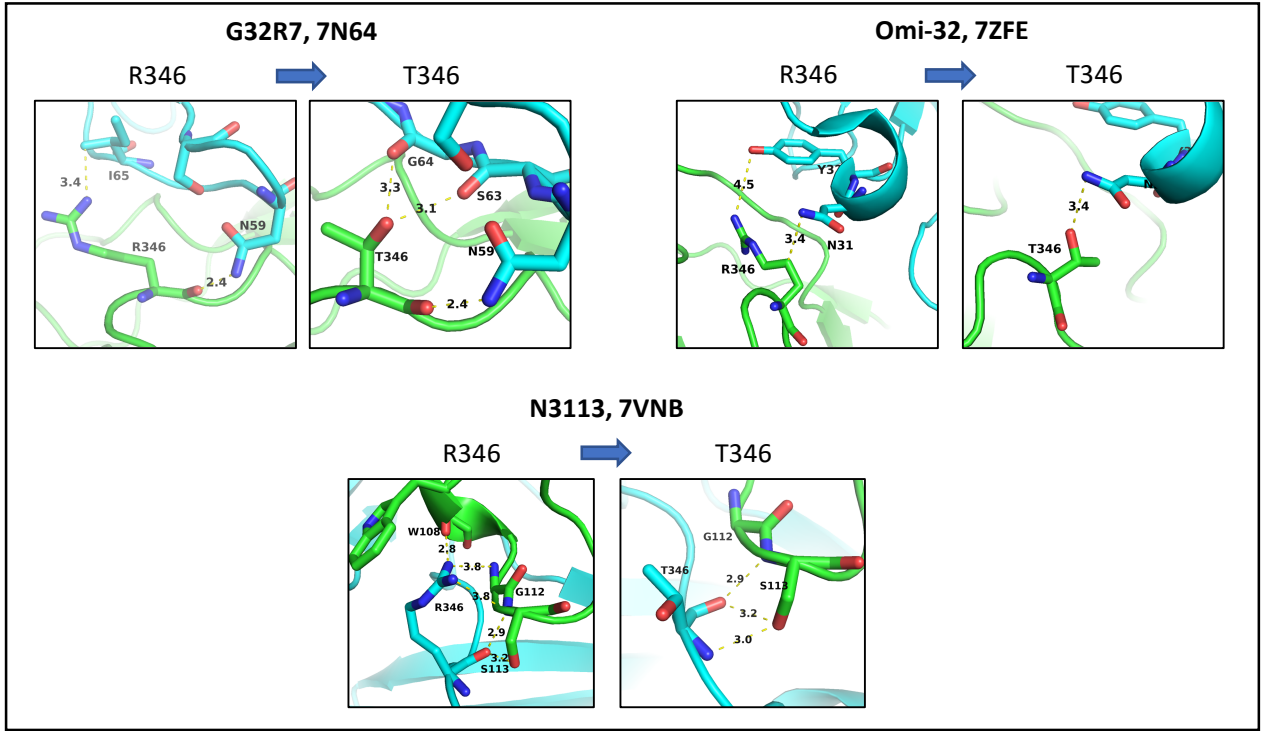

**b**

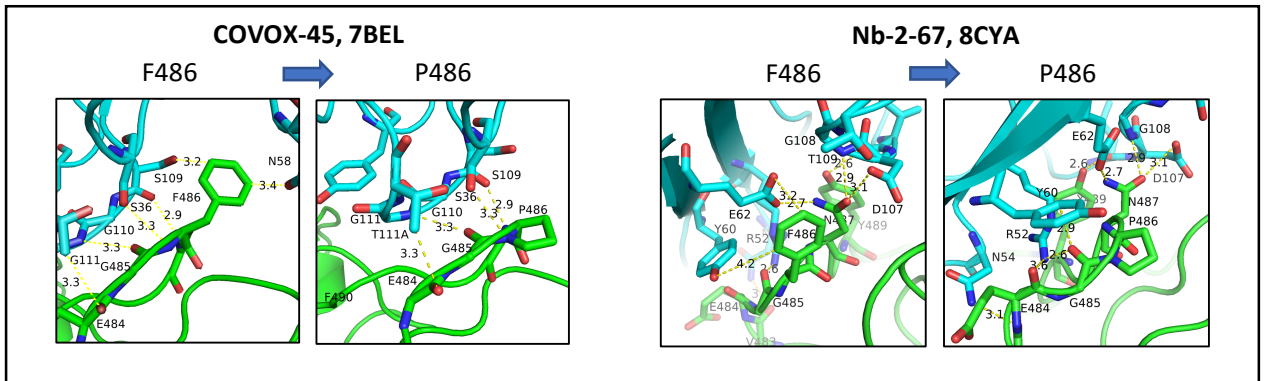

**Supplementary Fig. 4a and 4b** **a** Illustration of the location of the escape mutation (R346T) at ES2 for two antibodies (G32R7 and Omi-32), one nanobody (N3113). Omi-32 is the latest structure that is against sub-variants of BA.1 and BA.2<sup>3,4</sup>. **b** Illustration of the models that may prevent the escape mutation. COVOX-45: there are multiple contacts from main-chain of CDR3 to the loop of F486, although F486 mutates to P486. The P486 would not escape; Nb-2-67: although F486 mutated to P486, the mainchain contacts to R52 and Y60 do not change. There are also multiple hydrogen bonds to keep the E18 loop in contact.

# Supplementary Fig. 5

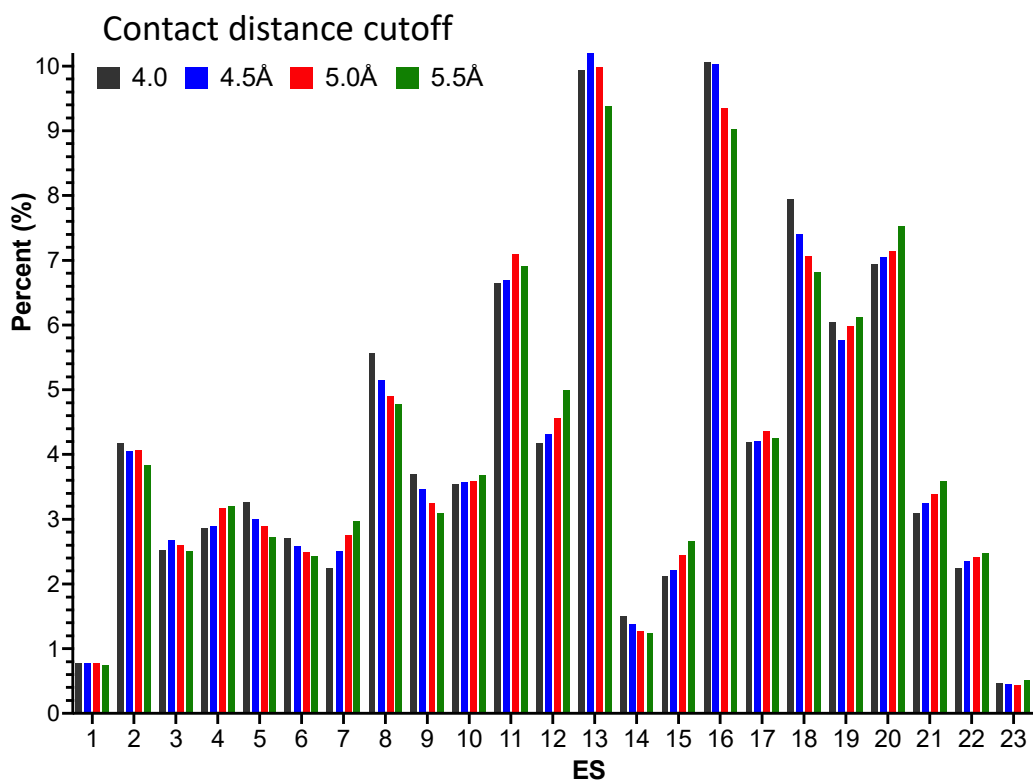

| ES | RANGE   | RBD       | Distance 4.0 |       | Distance 4.5 |       | Distance 5.0 |      | Distance 5.5 |      |
|----|---------|-----------|--------------|-------|--------------|-------|--------------|------|--------------|------|
|    |         |           | Hits         | (%)   | Hits         | (%)   | Hits         | (%)  | Hits         | (%)  |
| 1  | 339-341 | GEV       | 33           | 0.77  | 39           | 0.78  | 44           | 0.78 | 46           | 0.74 |
| 2  | 343-349 | NTRFAS    | 179          | 4.17  | 203          | 4.06  | 229          | 4.07 | 239          | 3.84 |
| 3  | 351-357 | YAWNRRK   | 108          | 2.52  | 134          | 2.68  | 146          | 2.60 | 156          | 2.51 |
| 4  | 368-374 | LYNSASF   | 123          | 2.86  | 145          | 2.90  | 178          | 3.17 | 199          | 3.20 |
| 5  | 375-380 | STFKCY    | 140          | 3.26  | 150          | 3.00  | 163          | 2.90 | 170          | 2.73 |
| 6  | 381-386 | GVSPTK    | 116          | 2.70  | 129          | 2.58  | 140          | 2.49 | 151          | 2.43 |
| 7  | 403-409 | RGDEVQR   | 96           | 2.24  | 125          | 2.50  | 155          | 2.76 | 185          | 2.97 |
| 8  | 411-417 | APGQTGK   | 239          | 5.57  | 258          | 5.15  | 276          | 4.91 | 297          | 4.78 |
| 9  | 420-428 | DYNYKLPDD | 159          | 3.70  | 173          | 3.46  | 182          | 3.24 | 192          | 3.09 |
| 10 | 437-443 | NSNNLDS   | 152          | 3.54  | 179          | 3.58  | 202          | 3.59 | 229          | 3.68 |
| 11 | 444-449 | KVGGNY    | 285          | 6.64  | 335          | 6.69  | 399          | 7.10 | 430          | 6.91 |
| 12 | 450-454 | NYLYR     | 179          | 4.17  | 216          | 4.31  | 257          | 4.57 | 311          | 5.00 |
| 13 | 455-460 | LFKRSN    | 427          | 9.94  | 521          | 10.41 | 561          | 9.98 | 584          | 9.39 |
| 14 | 462-467 | KPFERD    | 65           | 1.51  | 69           | 1.38  | 72           | 1.28 | 77           | 1.24 |
| 15 | 468-472 | ISTEI     | 91           | 2.12  | 111          | 2.22  | 137          | 2.44 | 166          | 2.67 |
| 16 | 473-479 | YQAGSTP   | 432          | 10.06 | 502          | 10.03 | 525          | 9.34 | 561          | 9.02 |
| 17 | 481-484 | NGVE      | 180          | 4.19  | 211          | 4.21  | 245          | 4.36 | 264          | 4.25 |
| 18 | 485-487 | GFN       | 341          | 7.94  | 371          | 7.41  | 397          | 7.06 | 424          | 6.82 |
| 19 | 488-491 | CYFP      | 260          | 6.05  | 289          | 5.77  | 336          | 5.98 | 381          | 6.13 |
| 20 | 492-496 | LQSYG     | 298          | 6.94  | 353          | 7.05  | 402          | 7.15 | 468          | 7.53 |
| 21 | 497-502 | FQPTNG    | 133          | 3.10  | 162          | 3.24  | 190          | 3.38 | 223          | 3.59 |
| 22 | 503-509 | VGYPYR    | 96           | 2.24  | 118          | 2.36  | 136          | 2.42 | 154          | 2.48 |
| 23 | 516-520 | ELLHA     | 20           | 0.47  | 23           | 0.46  | 25           | 0.44 | 32           | 0.51 |

**Supplementary Fig. 5** The distribution of contacts in percentage for each ES area with respect to the distance cutoff at 4.0 (gray), 4.5 (blue), 5.0 (red) and 5.5 (green) in Å. The represent the fraction of the H-chains of 340 antibodies.

# Supplementary Fig. 6

**a**

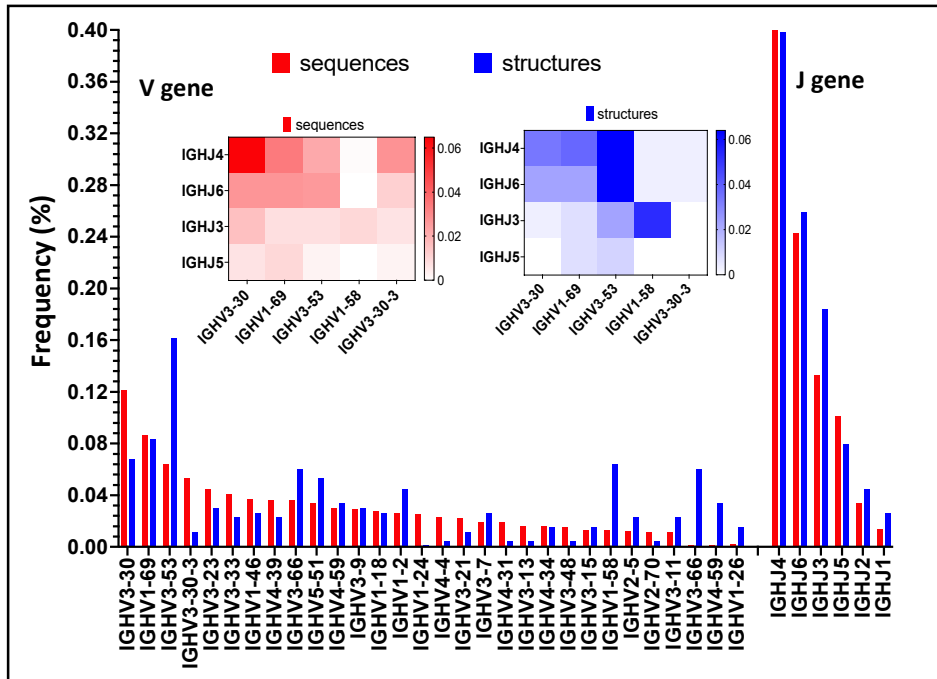

**b**

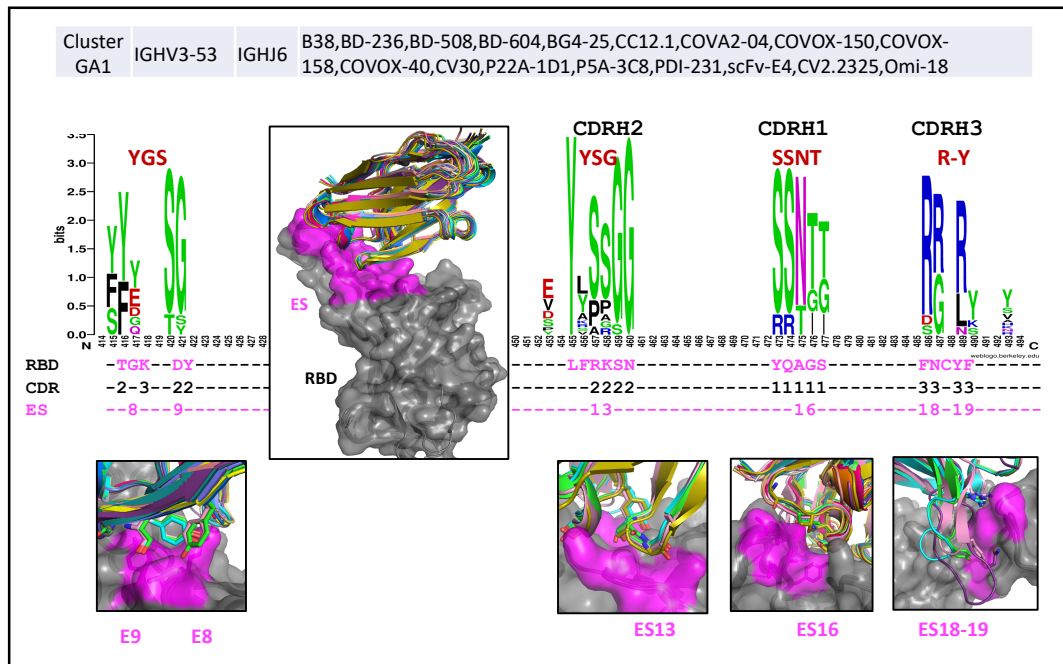

**Supplementary Fig. 6. a** The usage of V(D)J gene and combinations of antibody H-chain. The gene information is taken from Cov-AbDab with a total of 6316 antibody sequences, unique HV gene ids are 118 and unique HJ gene ids are 8. Only 266 presentative structures are found among of these mAbs. A frequency of sequences greater than 1% is plotted as descending order (red). The frequency of structures is plotted side by side (blue). Insertion heat maps presented the VJ combination (red for sequences, blue for structures). **b** A cluster GA1 based on the gene similarity (IGHV3-53+IGHJ6) is presented. The ES combination is (8,9,13,16,18,19), and the binding motifs are SSNT for CDRH1, YSG for CDRH2, and RY for CDRH3, which is similar to the Cluster A1S1 (Figure 5c). Insertion figure shows superimposed structures of the GA1 cluster.

## Supplementary Fig. 7

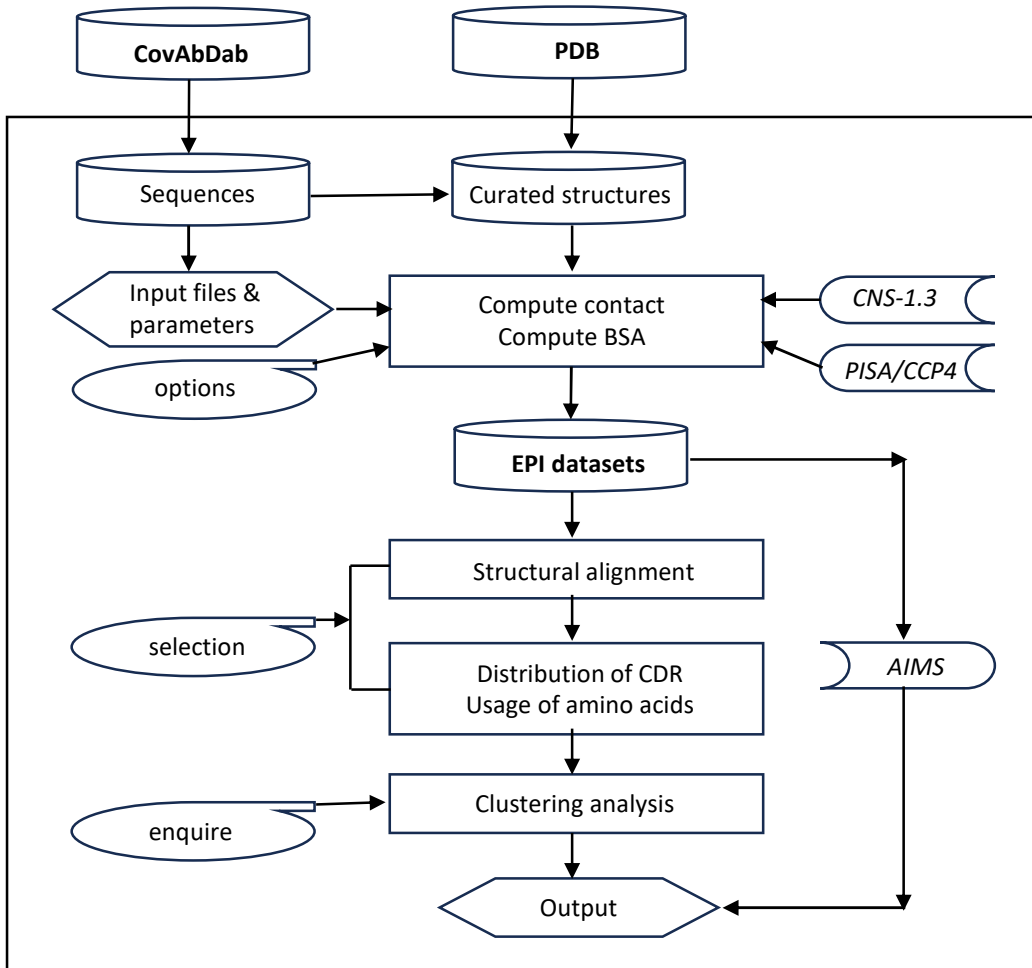

**Supplementary Fig. 7** A flowchart of EPI software package. The package utilizes the 3<sup>rd</sup> party software: *CNS-1.3*, *PISA/CCP4*, and *AIMS*.



## References for Supplementary Figures and Tables

- 1 Barnes, C. O. *et al.* Structures of Human Antibodies Bound to SARS-CoV-2 Spike Reveal Common Epitopes and Recurrent Features of Antibodies. *Cell* **182**, 828-842 e816 (2020). <https://doi.org:10.1016/j.cell.2020.06.025>
- 2 Crooks, G. E., Hon, G., Chandonia, J. M. & Brenner, S. E. WebLogo: A sequence logo generator. *Genome Research* **14**, 1188-1190 (2004).
- 3 Nutalai, R. *et al.* Potent cross-reactive antibodies following Omicron breakthrough in vaccinees. *Cell* **185**, 2116-2131 e2118 (2022). <https://doi.org:10.1016/j.cell.2022.05.014>
- 4 McCallum, M. *et al.* Structural basis of SARS-CoV-2 Omicron immune evasion and receptor engagement. *Science* **375**, 864-868 (2022). <https://doi.org:10.1126/science.abn8652>
