# Supplementary material for: SARS-CoV-2 antibodies recognize 23 distinct epitopic sites on the receptor binding domain
Source: PubMed Central journal article supplement (PMC10509263; doi:10.1038/s42003-023-05332-w), 2023-09-19
Supplement: 42003_2023_5332_MOESM3_ESM.pdf [file 42003_2023_5332_MOESM3_ESM.pdf]

## Description of Additional Supplementary Files

**File name:** Supplementary Data 1

**Description:** Each of the Ab structures taken from the PDB is listed by Name, PDB ID, epitope chain, and paratope chain designation. (see Methods). Whether the structure was derived from Ab/RBD (R) or Ab/spike (S) and the experimental method (X-ray (X) or cryo-EM (E) is also indicated. Resolution of the structure (in Å) and buried surface area (BSA in Å<sup>2</sup>) of the H or L chain and H+L chains (for Ab) to the RBD interface (see Methods) for the indicated Ab or Nb is given. The designation of the epitopic sites (ES) in the H chain or Nb interface is also given. Columns of “Variants” and a list of “Mutations (RBD)” are listed from the structure (PDB) file.

**File name:** Supplementary Data 2

**Description:** Each of the Nb structures taken from the PDB is listed by Name, PDB ID, epitope chain, and paratope chain designation. (see Methods). Whether the structure was derived from Ab/RBD (R) or Ab/spike (S) and the experimental method (X-ray (X) or cryo-EM (E) is also indicated. Resolution of the structure (in Å) and buried surface area (BSA in Å<sup>2</sup>) of the H or L chain and H+L chains (for Ab) to the RBD interface (see Methods) for the indicated Ab or Nb is given. The designation of the epitopic sites (ES) in the H chain or Nb interface is also given. Columns of “Variants” and a list of “Mutations (RBD)” are listed from the structure (PDB) file.

**File name:** Supplementary Movie 1

**Description:** Each ES is illustrated with the secondary structure of RBD.

**File name:** Supplementary Movie 2

**Description:** Each ES surface area or footprint is illustrated by a color map of the RBD surface.
